# Supplementary material for: Baiting studies on oral vaccination of the greater kudu (Tragelaphus strepsiceros) against rabies
Source: PubMed Central journal article supplement (PMC7088030; doi:10.1007/s10344-018-1220-z), 2018-10-09
Supplement: 10344_2018_1220_MOESM6_ESM.pdf [file 10344_2018_1220_MOESM6_ESM.pdf]

**Online Resource 6** Number of baits disappeared after selected periods in pens where sachet loaded baits were offered free-of-choice (h – hours). The baits were pierced on the thorns of acacia shrubs within the outdoor section of the enclosure. Experimental baits used: original camel thorn tree pods (control bait 2), apple-flavoured corn meal (type 3), grinded camel thorn tree pods mixed with gelatine (type 1 – dipped or poured)

| Group | Animals<br>(N) | Bait type         | Number of baits present |    |    |     |
|-------|----------------|-------------------|-------------------------|----|----|-----|
|       |                |                   | 0h                      | 3h | 8h | 24h |
| A     | 2              | Control bait<br>2 | 10                      | 1* | -  | -   |
| B     | 3              | 3                 | 15                      | 11 | 5  | 1   |
| C     | 2              | 1 (dipped)        | 10                      | 10 | 10 | 10  |
| D     | 3              | 1 (poured)        | 15                      | 1  | 1  | 1   |

\* - one bait left was found on the ground and removed from the pen
